# Supplementary material for: Clinical Usefulness of Monitoring Cytomegalovirus-Specific Immunity by Quantiferon-CMV in Pediatric Allogeneic Hematopoietic Stem Cell Transplantation Recipients
Source: PubMed Central journal article supplement — Ann Lab Med. 2017 Feb 17;37(3):277–81. doi: 10.3343/alm.2017.37.3.277 (PMC5339102; doi:10.3343/alm.2017.37.3.277), 2017-02-17
Supplement: alm-37-277-s001.pdf [file alm-37-277-s001.pdf]

**Supplemental Data Table S1.** Characteristics of the patients according to the presence or absence of CMV infection after allogeneic HSCT

|                                                                | Total<br>(N=25) | CMV infection during 1 yr post-allogeneic HSCT |               | <i>P</i> |
|----------------------------------------------------------------|-----------------|------------------------------------------------|---------------|----------|
|                                                                |                 | Presence (N=16)                                | Absence (N=9) |          |
| Age in months (median, range)                                  | 33 (4-226)      | 32 (4-163)                                     | 67 (4-226)    | 0.977    |
| Sex                                                            |                 |                                                |               | 0.364    |
| Male                                                           | 19              | 11                                             | 8             |          |
| Female                                                         | 6               | 5                                              | 1             |          |
| Diagnosis                                                      |                 |                                                |               | 0.587    |
| Hematologic malignancy                                         | 20              | 12                                             | 8             |          |
| Primary immune deficiency                                      | 2               | 1                                              | 1             |          |
| Solid tumor                                                    | 3               | 3                                              | 0             |          |
| Source of stem cell                                            |                 |                                                |               | 0.364    |
| Peripheral blood & bone marrow                                 | 19              | 11                                             | 8             |          |
| Cord blood                                                     | 6               | 5                                              | 1             |          |
| ABO match                                                      |                 |                                                |               | 0.864    |
| Match                                                          | 8               | 6                                              | 2             |          |
| Major mismatch                                                 | 11              | 6                                              | 5             |          |
| Minor mismatch                                                 | 6               | 4                                              | 2             |          |
| HLA match                                                      |                 |                                                |               | 0.010    |
| Match                                                          | 8               | 2                                              | 6             |          |
| Mismatch                                                       | 17              | 14                                             | 3             |          |
| CMV serostatus of donor/recipient                              |                 |                                                |               | 0.215    |
| Positive/Positive                                              | 16              | 11                                             | 5             |          |
| Negative/Positive                                              | 7               | 5                                              | 2             |          |
| Negative/Negative                                              | 2               | 0                                              | 2             |          |
| Conditioning regimen                                           |                 |                                                |               | 0.115    |
| Non-myeloablative & reduced                                    | 14              | 11                                             | 3             |          |
| Myeloablative                                                  | 11              | 5                                              | 6             |          |
| QF-CMV at post-allogeneic HSCT 4 weeks                         |                 |                                                |               | 0.088    |
| Positive                                                       | 8               | 4                                              | 4             |          |
| Negative                                                       | 7               | 3                                              | 4             |          |
| Indeterminate                                                  | 10              | 9                                              | 1             |          |
| N of CD34 <sup>+</sup> cells transplanted ( $\times 10^6$ /kg) |                 |                                                |               | 0.401    |
| $\geq 5$                                                       | 9               | 7                                              | 2             |          |
| $< 5$                                                          | 16              | 9                                              | 7             |          |
| N of death within 1 yr                                         | 6               | 2                                              | 4             |          |

Abbreviations: CMV, cytomegalovirus; HSCT, hematopoietic stem cell transplantation.
